# Supplementary material
Source: PubMed Central journal article supplement (PMC7076253)
Supplement: MCB.00547-19-s0001.pdf [file MCB.00547-19-s0001.pdf]

## Supplementary table 1. List of NGS samples

| Cell type                      | Treatment / differentiation time | Antibody / Method | Replicate | BioProject  | SRA experiment | GEO series | GEO sample | Citation                                              |
|--------------------------------|----------------------------------|-------------------|-----------|-------------|----------------|------------|------------|-------------------------------------------------------|
| Bone marrow-derived macrophage | 24h IL-4                         | PPAR $\gamma$     | rep1      | PRJNA318630 | SRX3097650     | GSE115083  | GSM3164887 | Daniel and Nagy et al. NAR. 2018. PMID: 29506156      |
| Bone marrow-derived macrophage | 24h IL-4                         | PPAR $\gamma$     | rep2      | PRJNA318630 | SRX3097649     | GSE115083  | GSM3164888 |                                                       |
| Bone marrow-derived macrophage | 24h IL-4                         | RXR               | -         | PRJNA318630 | SRX6750742     | GSE142249  | GSM4223704 |                                                       |
| Bone marrow-derived macrophage | -                                | PU.1              | -         | PRJNA318630 | SRX1716779     | GSE107456  | GSM2867721 | Daniel and Nagy et al. NAR. 2018. PMID: 29506156      |
| Bone marrow-derived macrophage | 1h IL-4                          | PU.1              | -         | PRJNA318630 | SRX1716764     | GSE107456  | GSM2867722 |                                                       |
| Bone marrow-derived macrophage | 6h IL-4                          | PU.1              | -         | PRJNA318630 | SRX1716766     | GSE107456  | GSM2867723 |                                                       |
| Bone marrow-derived macrophage | 24h IL-4                         | PU.1              | -         | PRJNA318630 | SRX1716812     | GSE107456  | GSM2867724 |                                                       |
| Bone marrow-derived macrophage | -                                | ATAC-seq          | -         | PRJNA318630 | SRX1716809     | GSE107456  | GSM2867754 | Daniel and Nagy et al. Immunity. 2018. PMID: 30332629 |
| Bone marrow-derived macrophage | 1h IL-4                          | ATAC-seq          | -         | PRJNA318630 | SRX1716803     | GSE107456  | GSM2867755 |                                                       |
| Bone marrow-derived macrophage | 6h IL-4                          | ATAC-seq          | -         | PRJNA318630 | SRX1716805     | GSE107456  | GSM2867756 |                                                       |
| Bone marrow-derived macrophage | 24h IL-4                         | ATAC-seq          | -         | PRJNA318630 | SRX1716804     | GSE107456  | GSM2867757 |                                                       |
| Bone marrow-derived macrophage | 24h IL-4 + 1h veh                | RNAPII-pS2        | rep1      | PRJNA318630 | SRX3097634     | GSE107456  | GSM2867748 | Daniel and Nagy et al. Immunity. 2018. PMID: 30332629 |
| Bone marrow-derived macrophage | 24h IL-4 + 1h veh                | RNAPII-pS2        | rep2      | PRJNA318630 | SRX3097633     | GSE107456  | GSM2867749 |                                                       |
| Bone marrow-derived macrophage | 24h IL-4 + 1h RSG                | RNAPII-pS2        | rep1      | PRJNA318630 | SRX3097632     | GSE107456  | GSM2867750 |                                                       |
| Bone marrow-derived macrophage | 24h IL-4 + 1h RSG                | RNAPII-pS2        | rep2      | PRJNA318630 | SRX3097631     | GSE107456  | GSM2867751 |                                                       |
| Bone marrow-derived macrophage | -                                | RNA-seq           | rep1      | PRJNA318630 | SRX1924028     | GSE106706  | GSM2845676 | Czimmerer et al. Immunity. 2018. PMID: 29343442       |
| Bone marrow-derived macrophage | -                                | RNA-seq           | rep2      | PRJNA318630 | SRX1924029     | GSE106706  | GSM2845677 |                                                       |
| Bone marrow-derived macrophage | -                                | RNA-seq           | rep3      | PRJNA318630 | SRX1924041     | GSE106706  | GSM2845678 |                                                       |
| Bone marrow-derived macrophage | -                                | RNA-seq           | rep4      | PRJNA318630 | SRX1924053     | GSE106706  | GSM2845679 |                                                       |
| Bone marrow-derived macrophage | 1h IL-4                          | RNA-seq           | rep1      | PRJNA318630 | SRX1924065     | GSE106706  | GSM2845680 |                                                       |
| Bone marrow-derived macrophage | 1h IL-4                          | RNA-seq           | rep2      | PRJNA318630 | SRX1924077     | GSE106706  | GSM2845681 |                                                       |
| Bone marrow-derived macrophage | 1h IL-4                          | RNA-seq           | rep3      | PRJNA318630 | SRX1924082     | GSE106706  | GSM2845682 |                                                       |
| Bone marrow-derived macrophage | 1h IL-4                          | RNA-seq           | rep4      | PRJNA318630 | SRX1924083     | GSE106706  | GSM2845683 |                                                       |
| Bone marrow-derived macrophage | 3h IL-4                          | RNA-seq           | rep1      | PRJNA318630 | SRX1924040     | GSE106706  | GSM2845695 |                                                       |
| Bone marrow-derived macrophage | 3h IL-4                          | RNA-seq           | rep2      | PRJNA318630 | SRX1924042     | GSE106706  | GSM2845696 |                                                       |
| Bone marrow-derived macrophage | 3h IL-4                          | RNA-seq           | rep3      | PRJNA318630 | SRX1924043     | GSE106706  | GSM2845697 |                                                       |
| Bone marrow-derived macrophage | 3h IL-4                          | RNA-seq           | rep4      | PRJNA318630 | SRX1924044     | GSE106706  | GSM2845698 |                                                       |
| Bone marrow-derived macrophage | 6h IL-4                          | RNA-seq           | rep1      | PRJNA318630 | SRX1924050     | GSE106706  | GSM2845703 |                                                       |
| Bone marrow-derived macrophage | 6h IL-4                          | RNA-seq           | rep2      | PRJNA318630 | SRX1924051     | GSE106706  | GSM2845704 |                                                       |
| Bone marrow-derived macrophage | 6h IL-4                          | RNA-seq           | rep3      | PRJNA318630 | SRX1924052     | GSE106706  | GSM2845705 |                                                       |
| Bone marrow-derived macrophage | 6h IL-4                          | RNA-seq           | rep4      | PRJNA318630 | SRX1924054     | GSE106706  | GSM2845706 |                                                       |
| Bone marrow-derived macrophage | 24h IL-4                         | RNA-seq           | rep2      | PRJNA318630 | SRX1924032     | GSE106706  | GSM2845688 |                                                       |
| Bone marrow-derived macrophage | 24h IL-4                         | RNA-seq           | rep3      | PRJNA318630 | SRX1924033     | GSE106706  | GSM2845689 |                                                       |
| Bone marrow-derived macrophage | 24h IL-4                         | RNA-seq           | rep4      | PRJNA318630 | SRX1924034     | GSE106706  | GSM2845690 |                                                       |
| E14-derived adipocyte          | Day 21                           | PPAR $\gamma$     | rep1      | PRJNA318630 | SRX6750743     | GSE142249  | GSM4223705 |                                                       |
| E14-derived adipocyte          | Day 21                           | PPAR $\gamma$     | rep2      | PRJNA318630 | SRX6750744     | GSE142249  | GSM4223706 |                                                       |
| E14-derived adipocyte          | Day 30                           | RXR               | -         | PRJNA318630 | SRX6750745     | GSE142249  | GSM4223707 |                                                       |
| 3T3-L1-derived adipocyte       | Day 7                            | C/EBP $\alpha$    | -         | PRJNA299295 | SRX1357062     | GSE74189   | GSM1913007 | Lai B et al. NAR. 2017. PMID: 28398509                |
| 3T3-L1-derived adipocyte       | Day 7                            | C/EBP $\beta$     | -         | PRJNA299295 | SRX1357066     | GSE74189   | GSM1913011 |                                                       |

# Supplementary Figure 1.

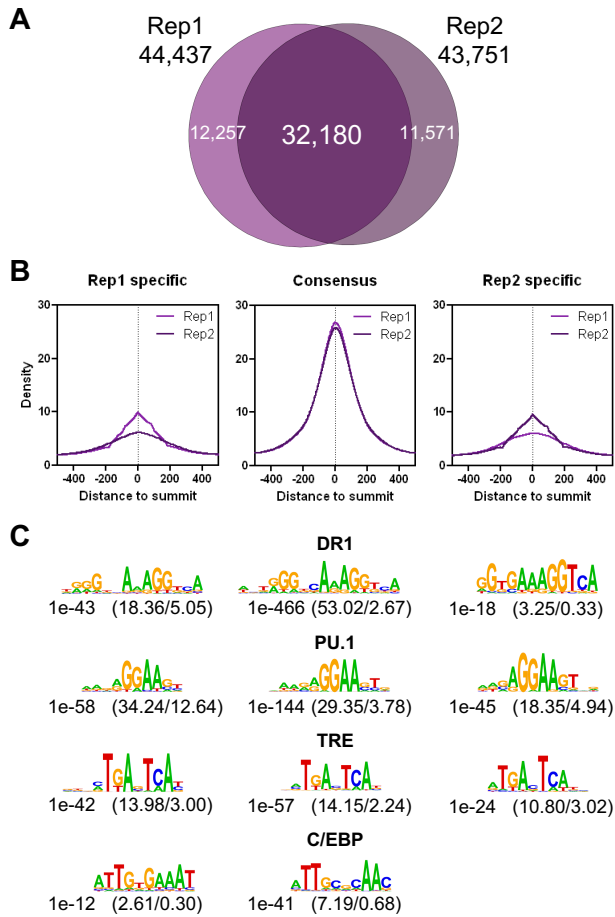

**Figure S1.** Overview of the PPAR $\gamma$  cistrome of alternatively polarized macrophages. **(A)** The overlap of the PPAR $\gamma$  peak sets determined from two biological replicates. **(B)** The average PPAR $\gamma$  ChIP-seq coverage relative to the summit position of the overlapping (consensus) and replicate specific peak sets, depicted in 10-bp resolution. **(C)** The *de novo* motifs enriched in the top 1,000 peaks of the consensus and replicate-specific peak sets. P-values and target/background percentages are indicated.

# Supplementary Figure 2.

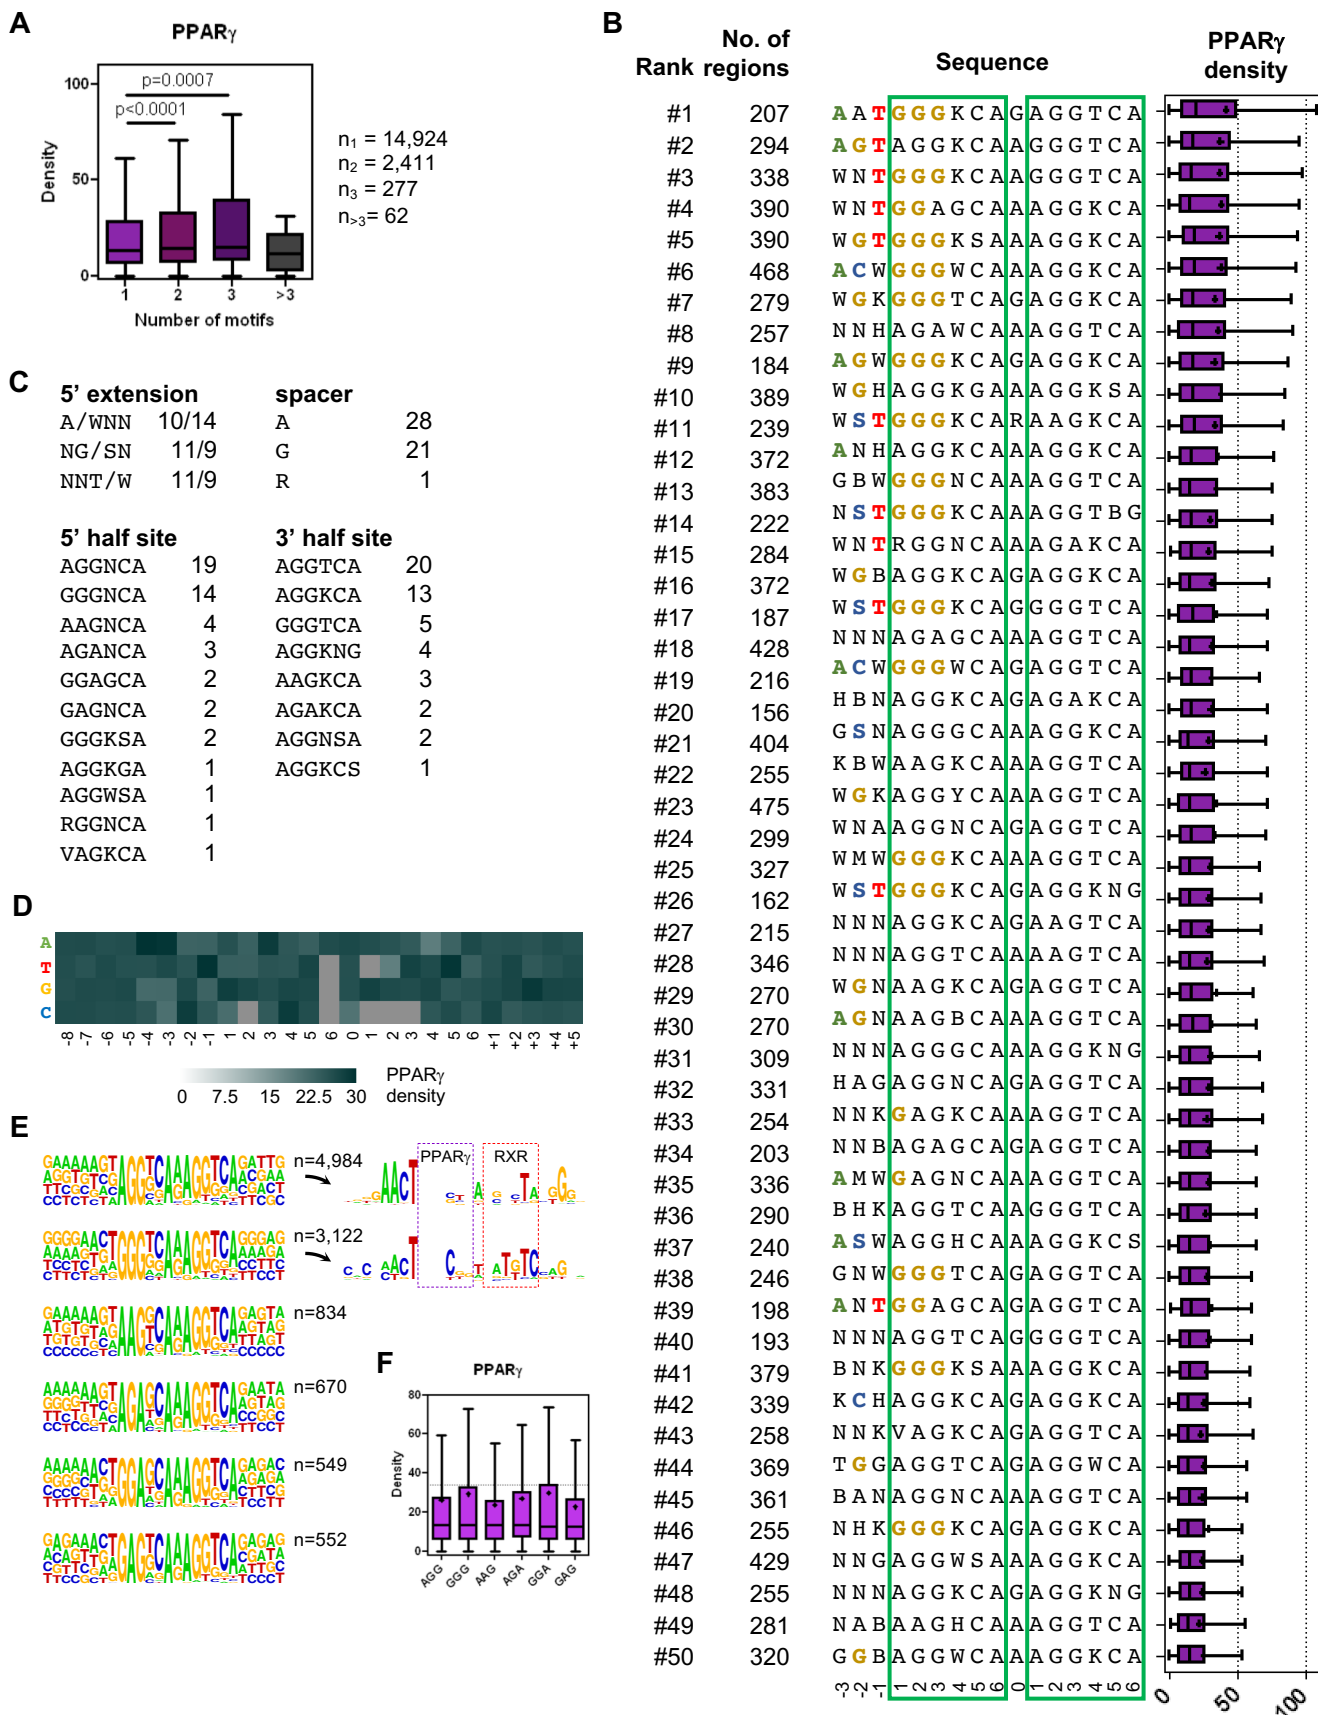

## Supplementary Figure 2.

**Figure S2.** Identification of the extensions of PPREs. **(A)** PPAR $\gamma$  ChIP-seq densities at those PPAR $\gamma$  binding sites harboring the indicated number of DR1s. P-values were determined by two-tailed unpaired t-tests. **(B)** The consensus sequence of DR1 clusters, determined by k-means clustering (k=50) of the single DR1 sequences per PPAR $\gamma$  binding site (n=14,924) and ranked by the per cluster upper quartile of the PPAR $\gamma$  ChIP-seq densities. Half sites and the nucleotides specific for the top clusters are highlighted. The box plot shows the PPAR $\gamma$  ChIP-seq densities of each DR1 motif cluster (right). **(C)** A summary of the sequence composition of the 50 clusters. **(D)** A heat map representing the average PPAR $\gamma$  ChIP-seq density of all DR1s harboring the indicated nucleotide (axis Y) at the indicated position (axis X). **(E)** The nucleotide frequencies of those single DR1s starting with 5'-AGG-3', 5'-GGG-3', 5'-AAG-3', 5'-AGA-3', 5'-GGA-3', or 5'-GAG-3' trinucleotides (left), and the result of Nucleotide Contribution Analysis for the most frequent ones (right). **(F)** The PPAR $\gamma$  ChIP-seq densities at those DR1s starting with the indicated nucleotide trimers.

# Supplementary Figure 3.

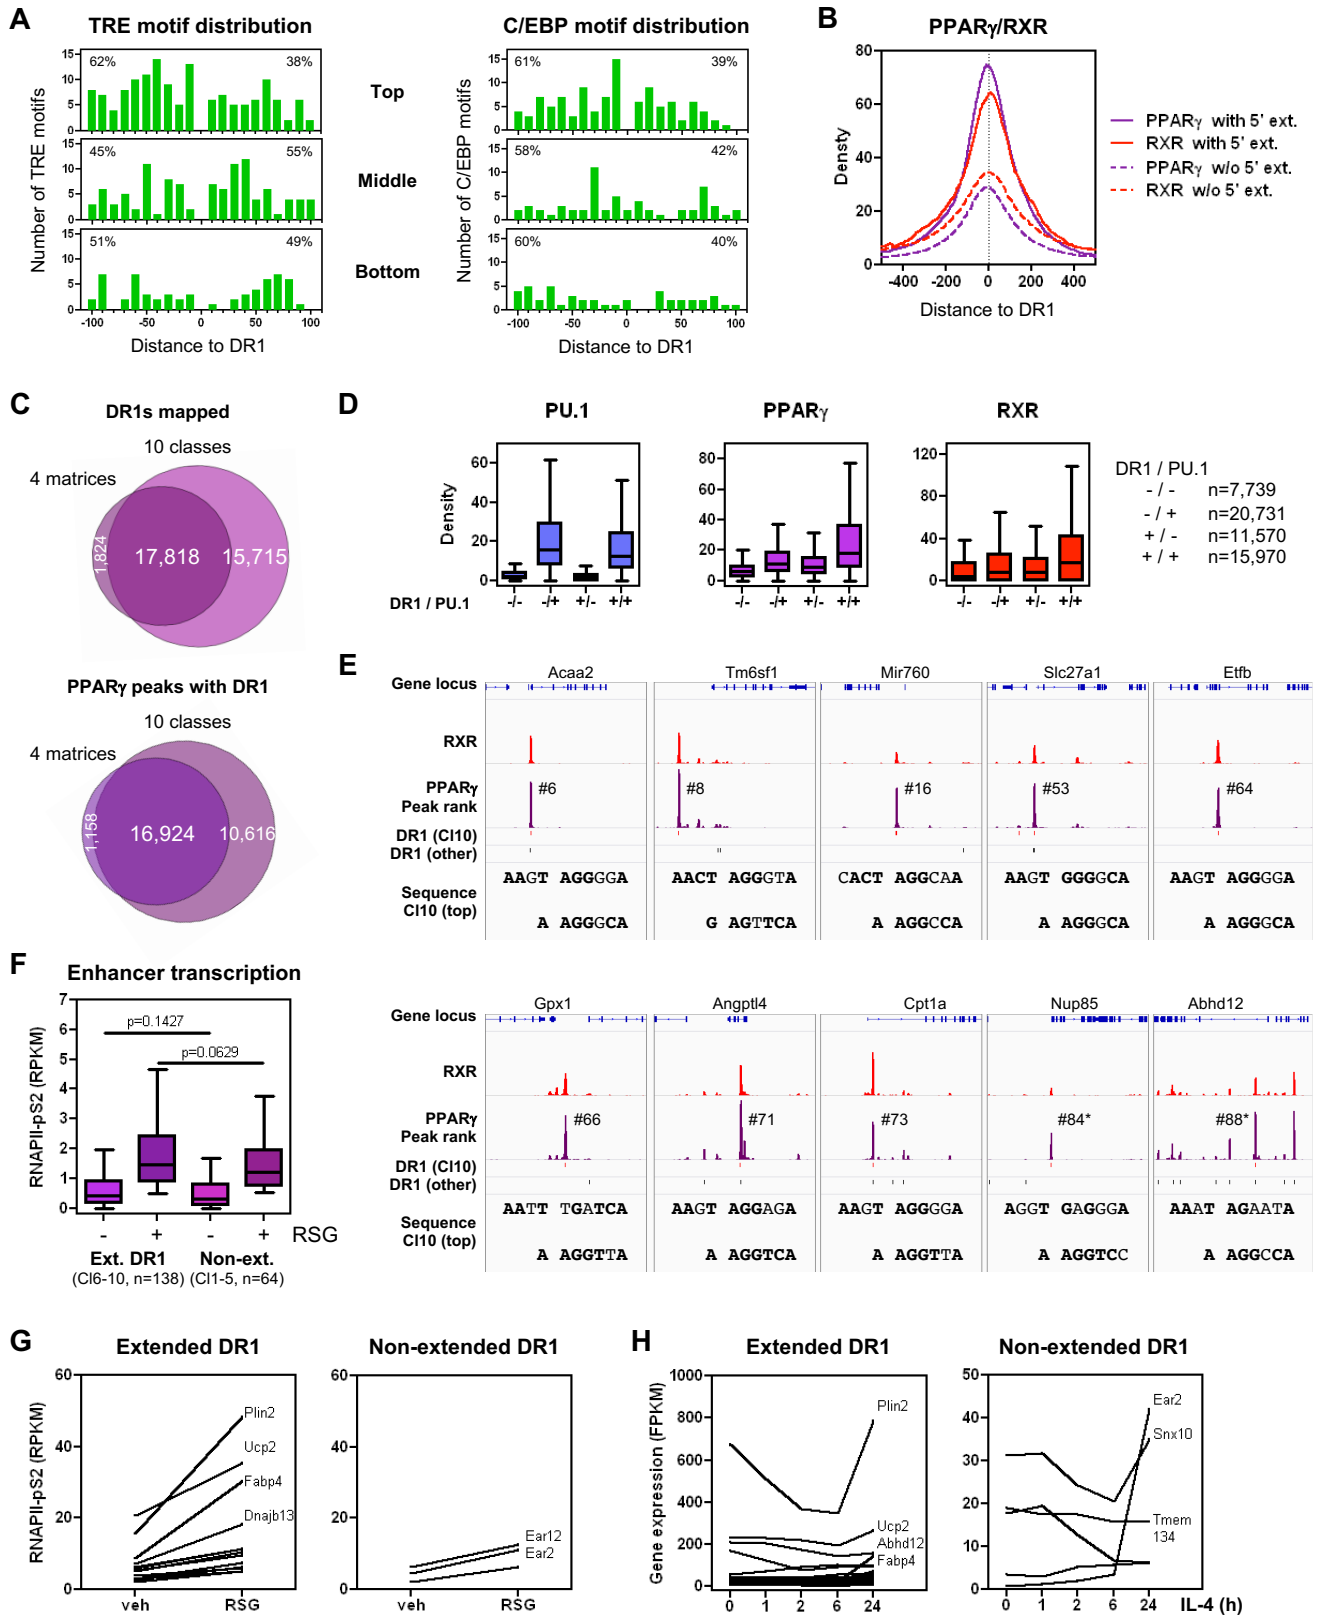

## Supplementary Figure 3.

**Figure S3.** Characterization of the unbalanced PPREs. **(A)** TRE (left) and C/EBP motif distribution (right) around the top, middle, and bottom 500 DR1s according to the PPAR $\gamma$  ChIP-seq densities, depicted in 10-bp resolution. **(B)** The average PPAR $\gamma$  and RXR ChIP-seq coverage of the extended (Ext4) and non-extended (Ext0) DR1s, depicted in 10-bp resolution. **(C)** Venn diagrams representing the overlap between the DR1s mapped by using the initial 4 motif matrices (Figure 1B) or those of the 10 classes (top), and the overlap between the PPAR $\gamma$  ChIP-seq peaks having DR1s mapped by using the initial 4 motif matrices or those of the 10 classes (bottom). **(D)** PU.1, PPAR $\gamma$ , and RXR ChIP-seq densities at the PPAR $\gamma$  binding sites having or lacking DR1 and/or PU.1. **(E)** Genomic view of the top 10 PPAR $\gamma$  (purple) ChIP-seq peaks with Class 10 DR1 together with the RXR coverage (red). The locus, the peak rank according to the peak score, the mapped Class 10 (red) or other (black) PPREs, and the sequence of Class 10 elements are included. **(F)** The RNAPII-pS2 ChIP-seq densities (RPKM) at extended (Classes 6-10) or non-extended (Classes 1-5) ligand-responsive DR1s in the presence or absence of Rosiglitazone (RSG). Fold difference (FD) > 1.5; Coverage > 0.5 RPKM. **(G)** The RNAPII-pS2 ChIP-seq densities (RPKM) of direct PPAR $\gamma$  target genes associated with extended (left) or non-extended DR1(s) (right) in the presence or absence of RSG. Genes are shown over 5 RPKM “expression” and 1.5 FD. **(H)** Expression changes of the identified genes associated with extended (left) or non-extended DR1(s) (right) upon IL-4 treatment at the indicated time points, determined with RNA-seq. Genes are shown over 5 FPKM expression.

# Supplementary Figure 4.

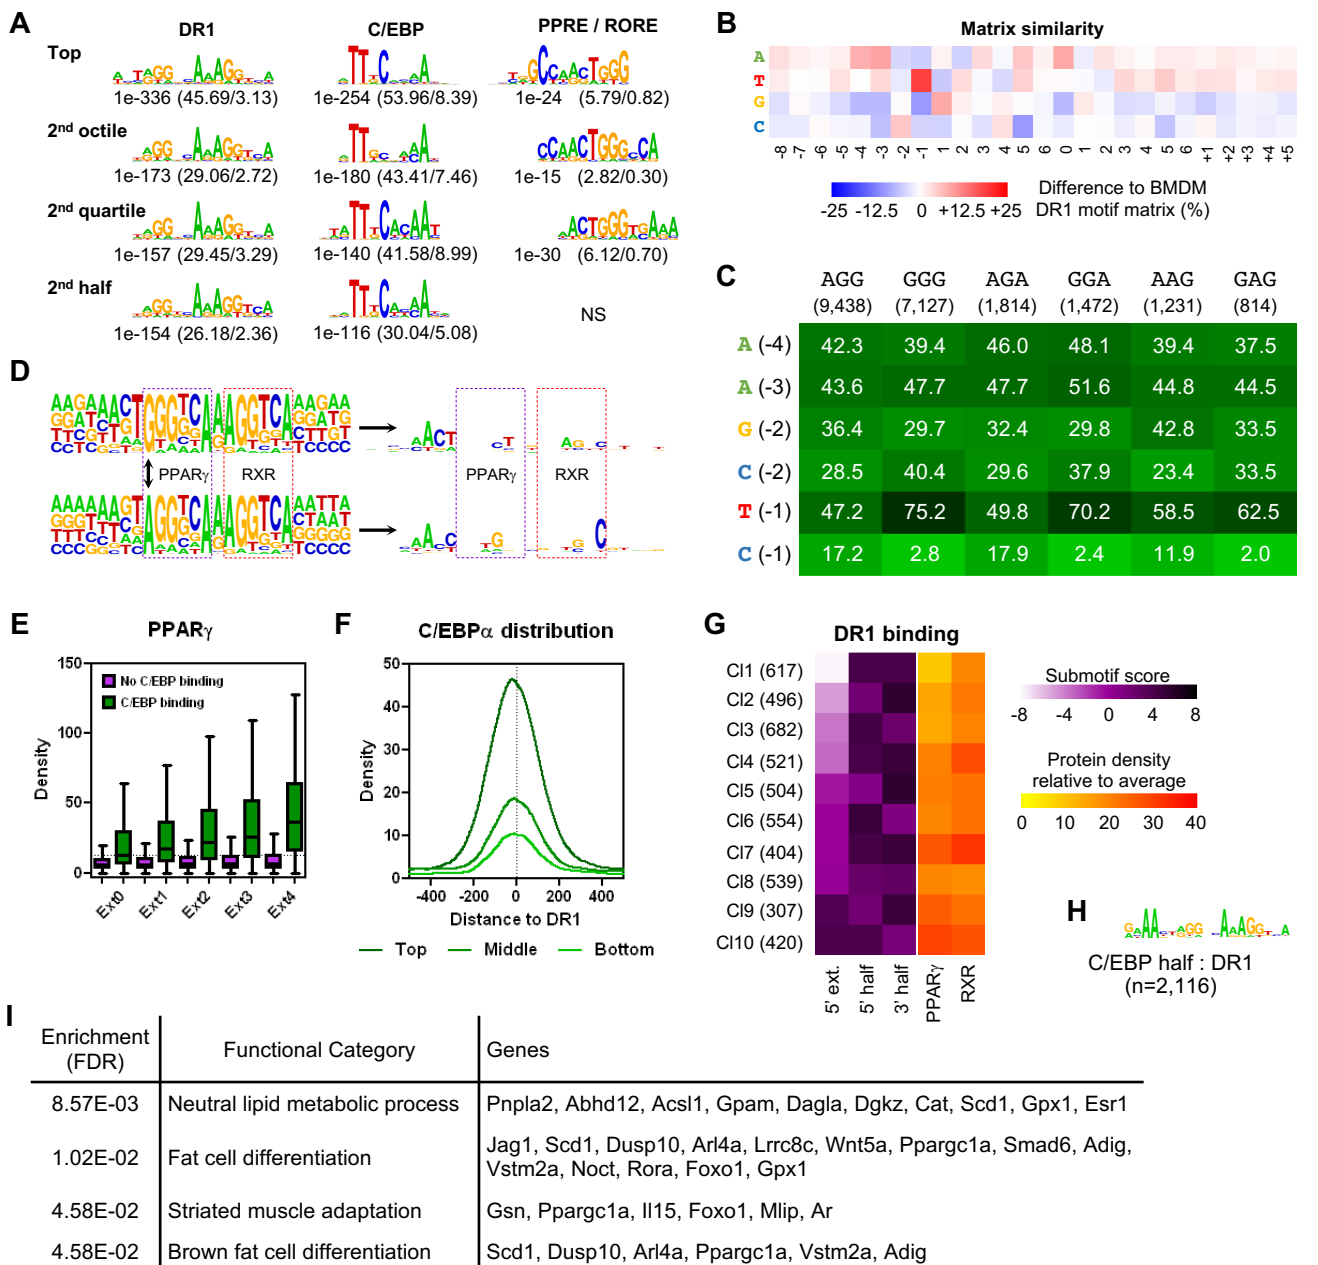

**Figure S4.** Characterization of the factors determining the adipocyte PPAR<sub>γ</sub> cistrome. **(A)** The *de novo* motifs enriched in the top 1,000 peaks of all, the 2<sup>nd</sup> octile, the 2<sup>nd</sup> quartile, and the bottom half of the consensus adipocyte PPAR<sub>γ</sub> peak set. P-values and target/background percentages are indicated. **(B)** The differences between the adipocyte- and macrophage-specific nucleotide frequencies within the single DR1 sequences per PPAR<sub>γ</sub> binding site. **(C)** Concomitance of the indicated nucleotides at the indicated positions (A-A-G/C-T/C) within the 5' extension (left) and the DR1s starting with the indicated trinucleotides (top), as expressed in percentage. **(D)** The nucleotide frequencies of the single DR1s starting with 5' 'A' or 'G' (left), and the result of Nucleotide Contribution Analysis (right). The PPAR and RXR half sites are highlighted with purple and red dashed lines, respectively. **(E)** The dependence of PPAR<sub>γ</sub> binding on the presence (green) or absence of C/EBP $\alpha/\beta$  (purple) and the strength of the 5' extension (Ext0-4). Extensions were discriminated by the number of those nucleotides matching with the 5'-AACT-3' sequence. **(F)** The average C/EBP $\alpha$  ChIP-seq coverage around the top, middle, and bottom 500 PPREs according to the PPAR<sub>γ</sub> ChIP-seq densities, depicted in 10-bp resolution. **(G)** Correlation between the average sub-motif score (5' extension, 5' half, and 3' half) and the PPAR<sub>γ</sub>/RXR ChIP-seq density of the 10 motif classes determined by k-means clustering (k=10), depicted in the presence of C/EBP. **(H)** A composite element containing a downstream C/EBP half site and a DR1 separated by two spacer nucleotides. **(I)** A table representing the top GO categories associated to C/EBP:DR1 composite elements.
